# Supplementary material for: Engineering NiMoO4/NiFe LDH/rGO multicomponent nanosheets toward enhanced electrocatalytic oxygen evolution reaction
Source: Royal Society of Chemistry journal article supplement (doi:10.1039/d2dt00115b), 2022-01-01
Supplement: d2dt00115b1.pdf [file d2dt00115b1.pdf]

**Engineering NiMoO<sub>4</sub>/NiFe LDH/rGO Multicomponent Nanosheets  
toward Enhanced Electrocatalytic Oxygen Evolution Reaction**

Lei Jin, Qing Wang, Kun Wang, Yuchen Lu, Bingji Huang, Hui Xu\*, Xingyue Qian,  
Lida Yang, Guangyu He\*, Haiqun Chen\*

*Key Laboratory of Advanced Catalytic Materials and Technology, Advanced  
Catalysis and Green Manufacturing Collaborative Innovation Center, Changzhou  
University, Changzhou, Jiangsu Province 213164, China.*

*Corresponding authors: xuhui006@cczu.edu.cn (H. Xu); hegy@cczu.edu.cn (G. He);*

*[hqchen@ccdu.edu.cn](mailto:hqchen@ccdu.edu.cn) (H. Chen)*

## **Materials and methods**

### **1.Reagents**

All chemicals utilized in the present work were purchased from Sinopharm Chemical Reagent Co, Ltd (China), including nickel nitrate hexahydrate  $\text{Ni}(\text{NO}_3)_2 \cdot 6\text{H}_2\text{O}$ , iron nitrate nonahydrate ( $\text{Fe}(\text{NO}_3)_3 \cdot 9\text{H}_2\text{O}$ ), sodium molybdate dehydrate ( $\text{Na}_2\text{MoO}_4 \cdot 2\text{H}_2\text{O}$ ), urea ( $\text{CO}(\text{NH}_2)_2$ ), ethanol ( $\text{C}_2\text{H}_5\text{OH}$ ) and potassium hydroxide (KOH). All of the above chemicals were of analytical grade and used as received without further purification.

### **2.Preparations**

Graphite oxide (GO) was prepared from scaly graphite powder through Hummers' method.<sup>25</sup>

#### **2.1 Synthesis of $\text{NiMoO}_4$ nanosheets**

The pristine  $\text{NiMoO}_4$  nanosheets were synthesized by a hydrothermal method. Typically,  $\text{Ni}(\text{NO}_3)_2 \cdot 6\text{H}_2\text{O}$  (4 mmol),  $\text{Na}_2\text{MoO}_4 \cdot 2\text{H}_2\text{O}$  (4 mmol), and  $\text{CO}(\text{NH}_2)_2$  (15 mmol) were dissolved in 50 mL of distilled water under sonication conditions, after stirring for 30 min, the solution was transferred to a 100 mL Teflon-lined stainless-steel autoclave, which was sealed and maintained at 150°C for 6 h. After cooling to room temperature naturally, the solid green produce was washed with deionized water and vacuum-dried at 60°C.

#### **2.2 Synthesis of $\text{NiMoO}_4/\text{NiFe LDH}$**

$\text{Ni}(\text{NO}_3)_2 \cdot 6\text{H}_2\text{O}$  (0.1 mmol),  $\text{Fe}(\text{NO}_3)_3 \cdot 9\text{H}_2\text{O}$  (0.1 mmol), and  $\text{CO}(\text{NH}_2)_2$  (5 mmol) were dissolved in 50 mL of distilled water to form a clear solution after 20 min of reaction with sonication. Next, the freshly prepared  $\text{NiMoO}_4$  (0.4 mmol) nanosheets that dispersed into 10 mL deionized water was dropped into above solution. After drastically stirring for 30 min at room temperature, the solution was transferred to a 100 mL Teflon-lined stainless-steel autoclave and maintained at

120°C for 12 h. Finally, the yellow solid products were collected and dried, the synthetic product was named as NiMoO<sub>4</sub>/NiFe LDH.

### **2.3 Synthesis of NiMoO<sub>4</sub>/NiFe LDH/rGO**

NiMoO<sub>4</sub>/NiFe LDH/rGO<sub>x</sub> composites with different contents of rGO (x = 5, 10 and 15 wt%) were synthesized by a hydrothermal method. In a typical procedure for preparing NiMoO<sub>4</sub>/NiFe LDH/rGO<sub>10%</sub>, 4.17 mL of GO suspension (0.272 wt%), Ni(NO<sub>3</sub>)<sub>2</sub>·6H<sub>2</sub>O (0.1 mmol), Fe(NO<sub>3</sub>)<sub>3</sub>·9H<sub>2</sub>O (0.1 mmol), and CO(NH<sub>2</sub>)<sub>2</sub> (5 mmol) were dissolved in 46 mL of distilled water to form a clear solution after 3 h of reaction with sonication, Next, the NiMoO<sub>4</sub> (0.4 mmol) nanosheets that dispersed into 10 mL deionized water was dropped into above solution, After drastic stirring for 30 min at room temperature, the solution was transferred to a 100 mL Teflon-lined stainless steel autoclave and maintained at 120°C for 12 h. After cooling to room temperature naturally, the black solid produce was washed and vacuum-dried at 60°C. For comparison, NiFe LDH was prepared in the absence of GO and NiMoO<sub>4</sub> while keeping other reaction with the same conditions.

### **3. Material characterizations**

The crystal phases and structures of the as-prepared samples were characterized by powder X-ray diffraction (XRD) with Bruker D8 Advance diffractometer (Cu Ka radiation,  $\lambda = 0.15418$  nm) in the  $2\theta$  range of 10-80° at a scanning rate of 0.05° s<sup>-1</sup>. The microstructures of the products were observed by transmission electron microscopy (TEM, JEM-2100F) and field-emission scanning electron microscopy (FESEM, Zeiss Supra 55) that equipped with element mappings and energy dispersive spectrometry (EDS). Raman spectra (Japan LabRAMHR evolution) of samples were recorded on a Renishaw in ViaReflex Raman microprobe. X-ray photoelectron spectroscopy (XPS,

PHI-5000C ESCA, PerkinElmer, USA) was employed to obtain elemental information of prepared catalysts on a VG ESCALAB MKII using Al Ka radiation. The N<sub>2</sub> adsorption desorption isotherms and the pore size distributions were characterized by Brunauer-Emmett-Teller method (BET, ASAP2010C).

#### 4. Electrochemical measurements

All the electrochemical measurements were operated using a CHI760 electrochemical workstation with a standard three electrode cell. The reference and counter electrodes were Hg/HgO and graphite rod, respectively. A glassy carbon electrode (GCE, 0.196 cm<sup>2</sup> area) that modified with catalyst ink is used as the working electrode. For the preparation of the catalyst ink, 2 mg of catalyst and 20 μL Nafion (5 wt%) was dissolved in 360 μL ethanol and 120 μL H<sub>2</sub>O, the ink was sonicated for 2 h to enable the solution to be uniformly dispersed. Then, 10 μL of the catalyst ink was dropped on the surface of GCE with a mass loading of 203.8 μg·cm<sup>-2</sup>. All potentials were measured against Hg/HgO and converted to reversible hydrogen electrode (RHE) by Nernst equation:  $E_{vs\ RHE} = E_{vs\ Hg/HgO} + 0.0591\ pH + 0.098$ . The overpotential ( $\eta$ ) was calculated through the formula:  $\eta = E_{RHE} - 1.23\ V$ . Cyclic Voltammograms (CV) were measured at a scan rate of 5 mV·s<sup>-1</sup>, Electrochemical impedance spectroscopy was tested over the frequency range of 10<sup>6</sup> to 10<sup>2</sup> Hz with an AC signal amplitude of 5 mV. The double-layer capacitances ( $C_{dl}$ ) were calculated through CV at different scan rates (*i.e.* 20, 40, 60, 80 and 100 mV·s<sup>-1</sup>) in 1.0 M KOH, which was used to evaluate the electrochemical active surface areas (ECSA). The long-term stability of the catalyst was conducted by chronopotentiometry. All the data of electrochemistry were presented without any iR correction.

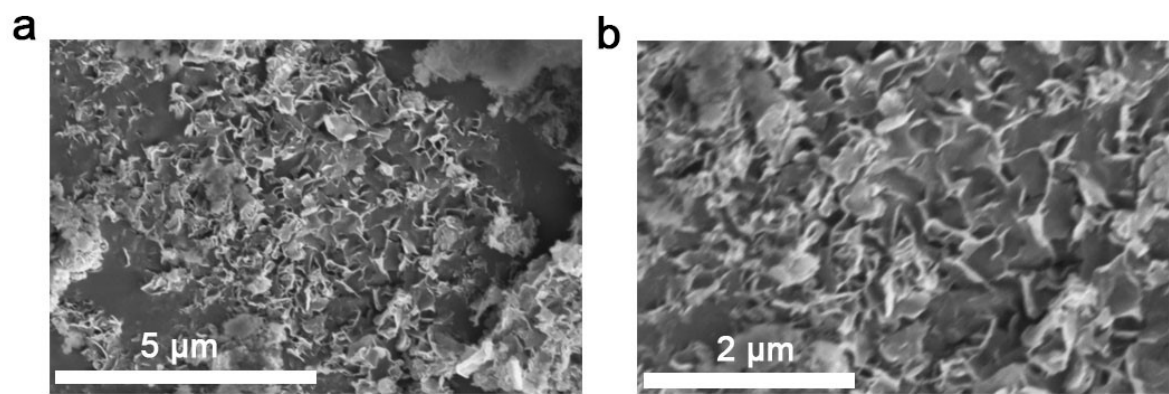

**Fig.S1** (a, b) SEM images of NiMoO<sub>4</sub>.

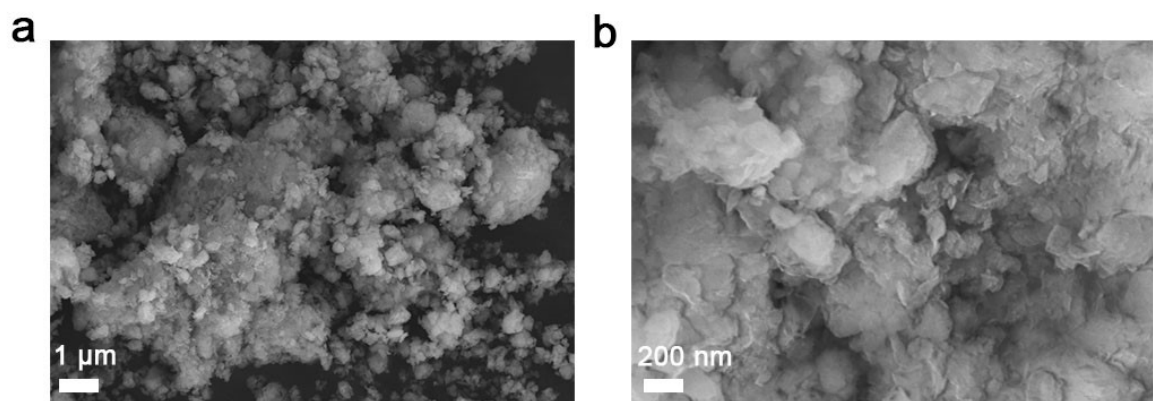

**Fig.S2** (a, b) SEM images of NiMoO<sub>4</sub>/NiFe LDH.

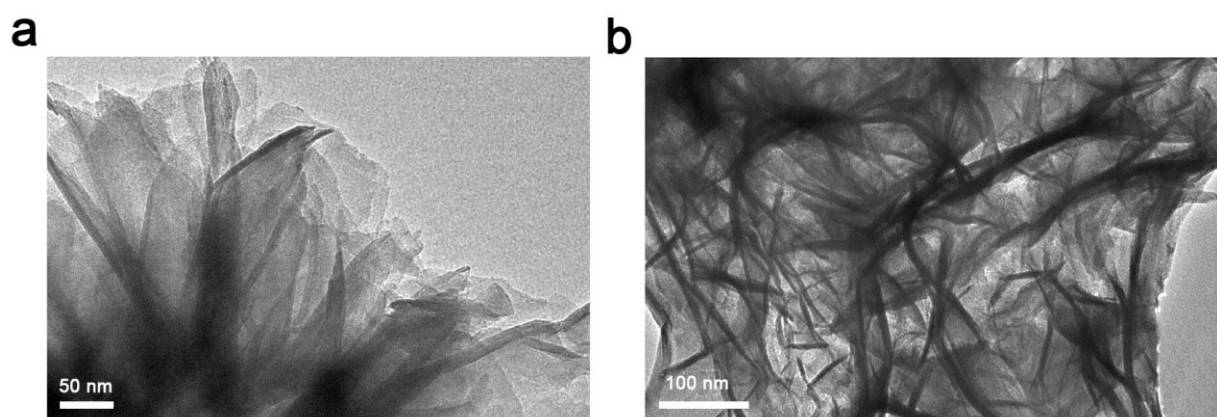

**Fig.S3** (a, b) TEM images of NiMoO<sub>4</sub>/NiFe LDH/rGO<sub>10%</sub>.

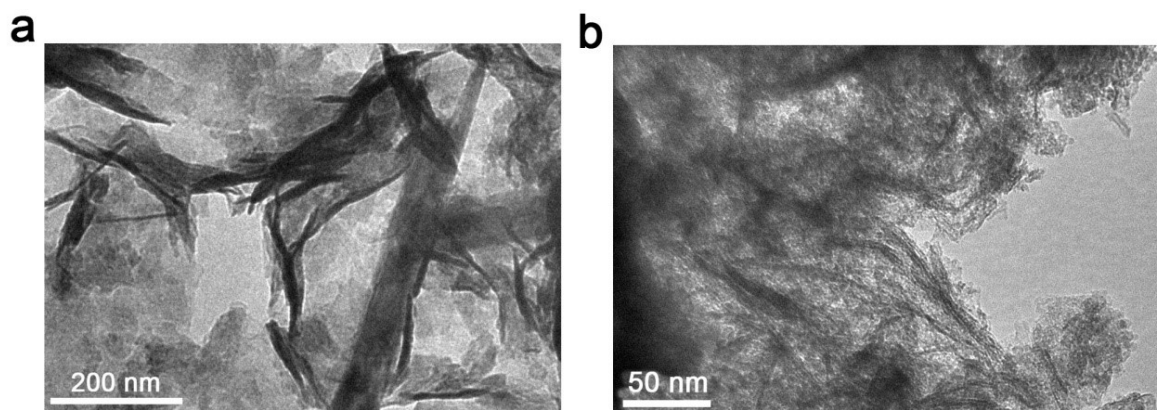

Fig.S4 (a, b) TEM images of NiMoO<sub>4</sub> and NiFe LDH.

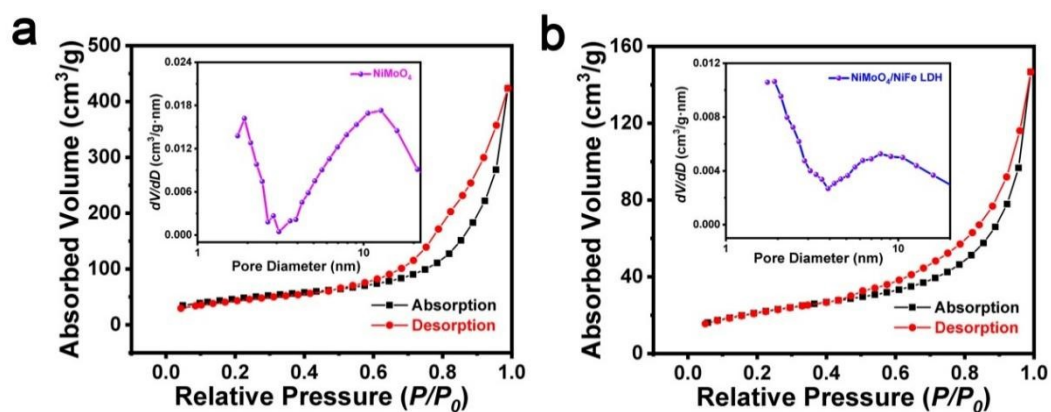

Fig.S5 N<sub>2</sub> adsorption-desorption isotherm of (a) NiMoO<sub>4</sub> and (b) NiMoO<sub>4</sub>/NiFe LDH.

Table S1 BET surface area of NiMoO<sub>4</sub>, NiFe LDH, NiMoO<sub>4</sub>/NiFe LDH and NiMoO<sub>4</sub>/NiFe LDH/rGO<sub>10%</sub> composites.

| Samples                                         | BET Surface area (m <sup>2</sup> ·g <sup>-1</sup> ) |
|-------------------------------------------------|-----------------------------------------------------|
| NiMoO <sub>4</sub>                              | 164.5                                               |
| NiFe LDH                                        | 74.5                                                |
| NiMoO <sub>4</sub> /NiFe LDH                    | 75.7                                                |
| NiMoO <sub>4</sub> /NiFe LDH/rGO <sub>10%</sub> | 101.8                                               |

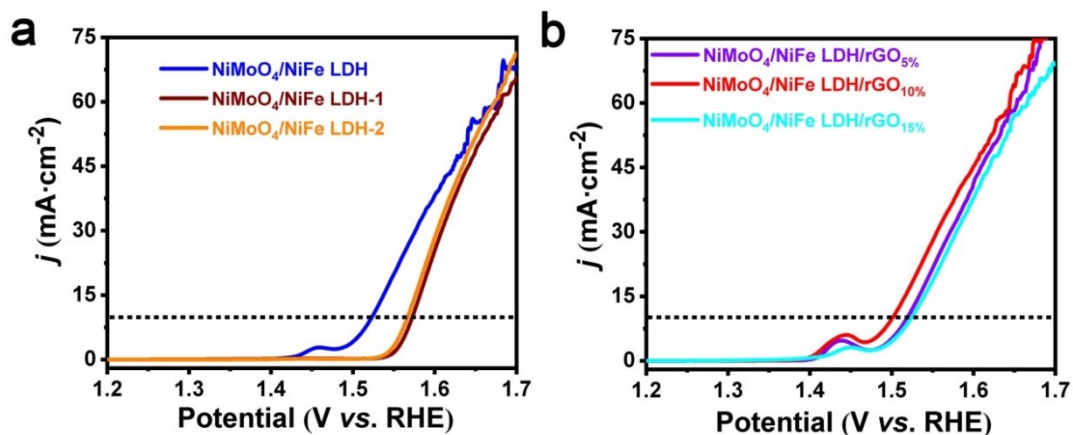

**Fig.S6** (a) LSV curves of NiMoO<sub>4</sub>/NiFe LDH, NiMoO<sub>4</sub>/NiFe LDH-x (x=1, 2) and (b) NiMoO<sub>4</sub>/NiFe LDH/rGO<sub>x</sub> (x= 5%, 10% and 15%).

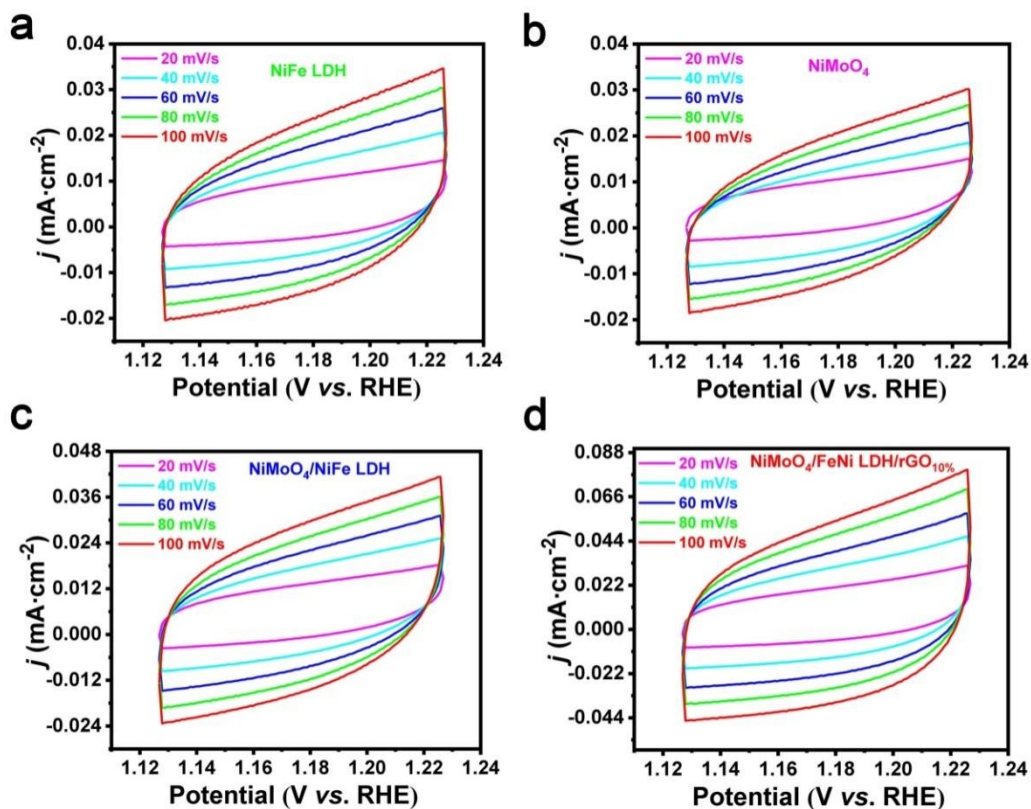

**Fig.S7** (a) CV curves of NiFe LDH, (b) NiMoO<sub>4</sub>, (c) NiMoO<sub>4</sub>/NiFe LDH and (d) NiMoO<sub>4</sub>/NiFe LDH/rGO<sub>10%</sub>.

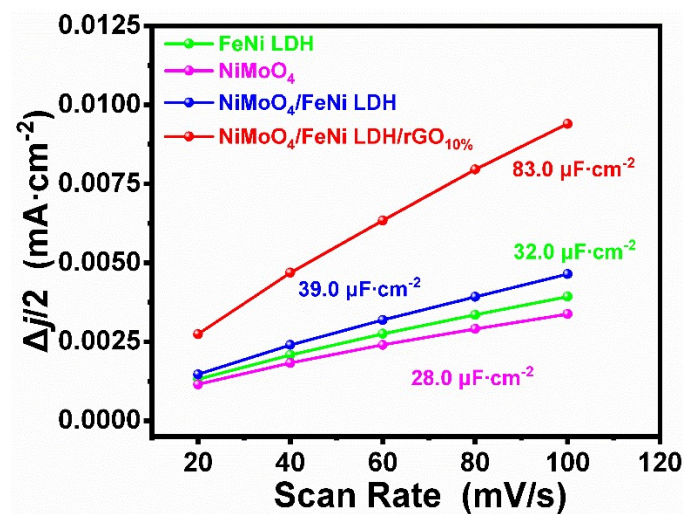

Fig.S8 Double layer currents of different catalysts versus scan rate.

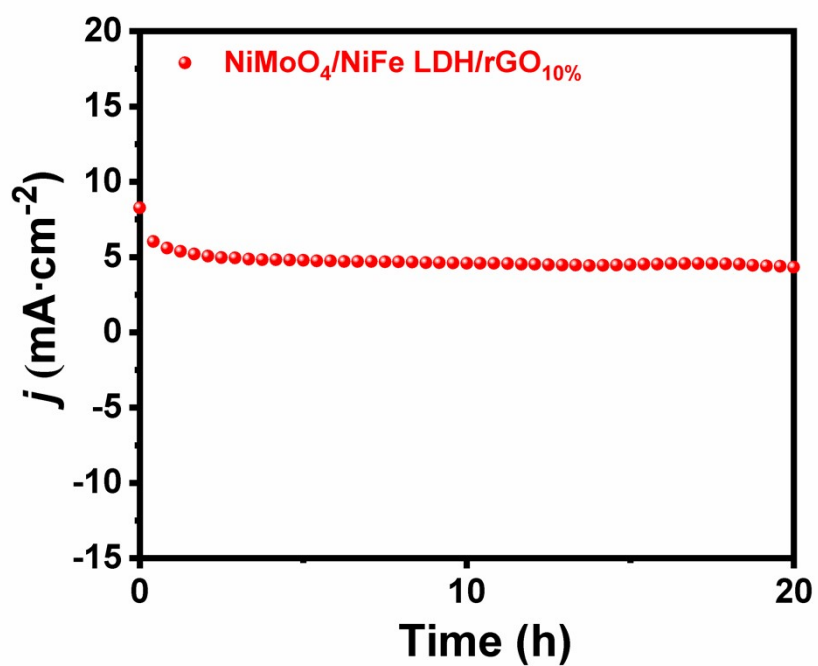

Fig.S9 Chronoamperometric curve of NiMoO<sub>4</sub>/NiFe LDH/rGO<sub>10%</sub> at a voltage of 1.5 V (vs. RHE).



**Table S2** OER activity comparison of different catalysts in alkaline condition ( $\eta$ : overpotential at the current density of  $10 \text{ mA}\cdot\text{cm}^{-2}$ ).

| Catalysts                                                                              | electrolyte      | $\eta$ (mV) | Tafel slope (mV/dec) | Reference        |
|----------------------------------------------------------------------------------------|------------------|-------------|----------------------|------------------|
| <b>NiMoO<sub>4</sub>@NiFe LDH-r<sub>10%</sub></b>                                      | <b>1.0 M KOH</b> | <b>270</b>  | <b>78.2</b>          | <b>This Work</b> |
| NiMoO <sub>4</sub> NRs-Fe-1                                                            | 1.0 M KOH        | 351         | 69                   | [1]              |
| FeZn <sub>4</sub> Co@CNFs                                                              | 0.1 M KOH        | 360         | 69                   | [2]              |
| Co/Ni@GC/NCNTs/CNFs                                                                    | 1.0 M KOH        | 395         | 64                   | [3]              |
| Zn <sub>0.4</sub> Ni <sub>0.6</sub> Co <sub>2</sub> O <sub>4</sub> /NCNTs              | 0.1 M KOH        | 410         | 118                  | [4]              |
| FeNi/(FeNi) <sub>9</sub> S <sub>8</sub>                                                | 1.0 M KOH        | 283         | 64                   | [5]              |
| Fe <sub>2</sub> M-MIL-88B                                                              | 0.1 M KOH        | 307         | 38                   | [6]              |
| ODAC-CoO                                                                               | 0.1 M KOH        | 364         | 68.6                 | [7]              |
| Sr <sub>2</sub> Co <sub>1.5</sub> Fe <sub>0.5</sub> O <sub>6-<math>\delta</math></sub> | 1.0 M KOH        | 318         | 44.8                 | [8]              |
| FeNi-LDH/Ti <sub>3</sub> C <sub>2</sub>                                                | 1.0 M KOH        | 298         | 43                   | [9]              |
| NiMn-LDH-rGO                                                                           | 1.0 M KOH        | 280         | 46                   | [10]             |
| FeNi-LDH/3D carbon                                                                     | 0.1 M KOH        | 340         | 71                   | [11]             |
| ER-Co <sub>3</sub> O <sub>4</sub> NWs-2                                                | 1.0 M KOH        | 370         | 70                   | [12]             |
| CoO-MoO <sub>2</sub>                                                                   | 1.0 M KOH        | 312         | 70                   | [13]             |
| NiMo-FG                                                                                | 1.0 M KOH        | 338         | 67                   | [14]             |
| CoFe <sub>2</sub> O <sub>4</sub>                                                       | 1.0 M KOH        | 275         | 42                   | [15]             |
| Co <sub>2</sub> Mo <sub>3</sub> O <sub>8</sub> @NC-800                                 | 1.0 M KOH        | 331         | 88                   | [16]             |

## References

- [1] C. Ye, J. Liu, Q. Zhang, X. Jin, Y. Zhao, Z. Pan, G. Chen, Y. Qiu, D. Ye, L. Gu, *J. Am. Chem. Soc.* 2021, 143, 14169-14177.
- [2] F. Wang, Z. Xiao, X. Liu, J. Ren, T. Xing, Z. Li, X. Li, Y. Chen, *J. Power Sources.* 2022, 521, 230925.
- [3] J. Li, J. Qian, X. Chen, X. Zeng, L. Li, B. Ouyang, E. Kan, W. Zhang, *Comp. Part B: Eng.* 2021, 231 109573.
- [4] X.T. Wang, T. Ouyang, L. Wang, J.H. Zhong, Z.Q. Liu, *Angew. Chem. Int. Ed.* 2020, 132, 132 6554-6561.
- [5] H.-L. Meng, S.-Y. Lin, J.-J. Feng, L. Zhang, A.-J. Wang, *J. Colloid Interface Sci.* 2022, 610, 573-582.
- [6] C. Wu, X. Zhang, H. Li, Z. Xia, S. Yu, S. Wang, G. Sun, *Chin. J. Catal.* 2021, 42, 637-647.
- [7] Y. Tian, X. Liu, L. Xu, D. Yuan, Y. Dou, J. Qiu, H. Li, J. Ma, Y. Wang, D. Su, *Adv. Funct. Mater.* 2021, 31, 2101239.
- [8] S.R. Ede, C.N. Collins, C.D. Posada, G. George, H. Wu, W.D. Ratcliff, Y. Lin, J. Wen, S. Han, Z. Luo, *ACS Catal.* 2021, 11, 4327-4337.
- [9] M. Yu, S. Zhou, Z. Wang, J. Zhao, J. Qiu, *Nano Energy* 2018, 44, 181-190.
- [10] W. Ma, R. Ma, J. Wu, P. Sun, X. Liu, K. Zhou, T. Sasaki, *Nanoscale* 2016, 8, 10425-10432.
- [11] W. Wang, Y. Liu, J. Li, J. Luo, L. Fu, S. Chen, *J. Mater. Chem. A* 2018, 6, 14299-14306.
- [12] S. Liu, H. Cheng, K. Xu, H. Ding, J. Zhou, B. Liu, W. Chu, C. Wu, Y. Xie, *ACS Energy Lett.* 2018, 4, 423-429.
- [13] F. Lyu, Y. Bai, Z. Li, W. Xu, Q. Wang, J. Mao, L. Wang, X. Zhang, Y. Yin, *Adv. Funct. Mater.* 2017, 27, 1702324.
- [14] S. Jeong, K. Hu, T. Ohto, Y. Nagata, H. Masuda, J.-i. Fujita, Y. Ito, *ACS Catal.* 2019, 10, 792-799.
- [15] H. Fang, T. Huang, D. Liang, M. Qiu, Y. Sun, S. Yao, J. Yu, M.M. Dinesh, Z. Guo, Y. Xia, *J. Mater. Chem. A.* 2019, 7, 7328-7332.
- [16] T. Ouyang, X.T. Wang, X.Q. Mai, A.N. Chen, Z.Y. Tang, Z.Q. Liu, *Angew. Chem. Int. Ed.* 2020, 59, 11948-11957.
